# Supplementary material
Source: HighWire-hosted journal article supplement (https://thorax.bmj.com/content/71/9/804)
Supplement: inline-supplementary-material-1 [file inline-supplementary-material-1.pdf]

**Supplemental information:**

Supplemental Table 1. Pulmonary function in subjects with mild asymptomatic airway obstruction, patients with mild chronic obstructive pulmonary disease (COPD), and healthy controls expressed as a percentage of the predicted value.

|                                        | Asymptomatic airway obstruction<br>(n=20) | COPD<br>(n=20)            | Healthy controls<br>(n=20) |
|----------------------------------------|-------------------------------------------|---------------------------|----------------------------|
| Post-BD FEV <sub>1</sub> , % predicted | 84.4 ± 3.2 <sup>#</sup>                   | 84.7 ± 3.9 <sup>#</sup>   | 104.7 ± 4.8                |
| Post-BD FEV <sub>1</sub> /FVC, %       | 61.4 ± 4.1 <sup>#</sup>                   | 59.3 ± 4.9 <sup>#</sup>   | 76.9 ± 4.0                 |
| Pre-BD pulmonary function              |                                           |                           |                            |
| FEV <sub>1</sub> , % predicted         | 80.9 ± 3.3 <sup>#</sup>                   | 80.2 ± 3.4 <sup>#</sup>   | 103.6 ± 4.5                |
| FVC, % predicted                       | 103.5 ± 5.6                               | 104.5 ± 6.1               | 107.2 ± 5.4                |
| FRC, % predicted                       | 109.5 ± 15.4                              | 118.9 ± 24.5              | 109.9 ± 21.3               |
| IC, % predicted                        | 115.0 ± 20.1                              | 111.8 ± 27.8              | 125.8 ± 20.0               |
| FEF <sub>25-75</sub> , % predicted     | 35.3 ± 7.6 <sup>#</sup>                   | 33.9 ± 8.5 <sup>#</sup>   | 73.1 ± 15.9                |
| RV, % predicted                        | 100.8 ± 21.3 <sup>*</sup>                 | 123.7 ± 32.4 <sup>#</sup> | 101.7 ± 25.3               |
| TLC, % predicted                       | 105.2 ± 8.6                               | 109.3 ± 9.8               | 108.9 ± 14.6               |
| TLCO, % predicted                      | 81.1 ± 15.9 <sup>#</sup>                  | 81.9 ± 24.3 <sup>#</sup>  | 96.9 ± 17.1                |
| KCO, % predicted                       | 88.7 ± 13.1 <sup>#</sup>                  | 88.7 ± 21.5 <sup>#</sup>  | 103.6 ± 14.1               |

*Definition of abbreviations:* COPD = chronic obstructive pulmonary disease; BD = bronchodilator; FEV<sub>1</sub>= forced expiratory volume in 1 second; FVC = forced vital capacity; FRC = functional residual capacity; IC = inspiratory capacity; FEF<sub>25-75</sub> = maximal mid-expiratory flows; RV = residual volume; TLC = total lung capacity; TLCO = lung transfer for carbon monoxide; KCO = carbon monoxide transfer coefficient. Values are means ± SD.

\*: p < 0.05 vs. COPD; #: p < 0.05 vs. controls

Supplemental Table 2. Measurements at ventilatory threshold

|                                               | Asymptomatic airway obstruction<br>(n=20) | COPD<br>(n=20)         | Healthy controls<br>(n=20) |
|-----------------------------------------------|-------------------------------------------|------------------------|----------------------------|
| Work rate, W                                  | 99 ± 28                                   | 96 ± 40                | 107 ± 41                   |
| HR, beat/min                                  | 125 ± 13                                  | 120 ± 14               | 125 ± 13                   |
| V'O <sub>2</sub> , L/min                      | 1.39 ± 0.38                               | 1.35 ± 0.48            | 1.56 ± 0.42                |
| O <sub>2</sub> pulse, mL O <sub>2</sub> /beat | 11.1 ± 2.6                                | 11.2 ± 3.4             | 12.5 ± 3.2                 |
| V'E, L/min (% estimated MVV)                  | 44.6 ± 12.4 (45 ± 12)                     | 42.2 ± 12.8 (44 ± 13)  | 46.1 ± 11.0 (39 ± 8)       |
| f, breaths/min                                | 20.2 ± 4.7                                | 22.2 ± 7.7             | 21.0 ± 3.8                 |
| VT, L                                         | 2.21 ± 0.48                               | 1.90 ± 0.53            | 2.20 ± 0.49                |
| V'E/V'CO <sub>2</sub>                         | 31.8 ± 4.2                                | 33.6 ± 8.4             | 30.3 ± 3.5                 |
| Dyspnoea, Borg scale                          | 3.8 ± 1.1                                 | 4.6 ± 1.3 <sup>#</sup> | 2.3 ± 1.7                  |
| Leg discomfort, Borg scale                    | 4.2 ± 2.1                                 | 4.7 ± 2.1              | 3.0 ± 0.8                  |

*Definition of abbreviations:* COPD = chronic obstructive pulmonary disease; HR = heart rate; V'O<sub>2</sub> = oxygen uptake; V'E = minute ventilation; MVV = maximal voluntary ventilation; f = respiratory rate; VT = tidal volume; V'E/V'CO<sub>2</sub> = ventilatory equivalents for carbon dioxide.

Values are means ± SD. <sup>#</sup>: p < 0.05 vs. controls

**Supplemental Figure 1.** Tidal volume (VT; panel A), breathing frequency (F; panel B) and inspiratory reserve volume (IRV, expressed as a percentage of total lung capacity [TLC]; panel C) are plotted in relation to minute ventilation. Values are means  $\pm$  SEM. #:  $p < 0.05$  vs. healthy controls ; \*:  $p < 0.05$  vs. COPD patients at a given minute ventilation (Scheffe's tests).

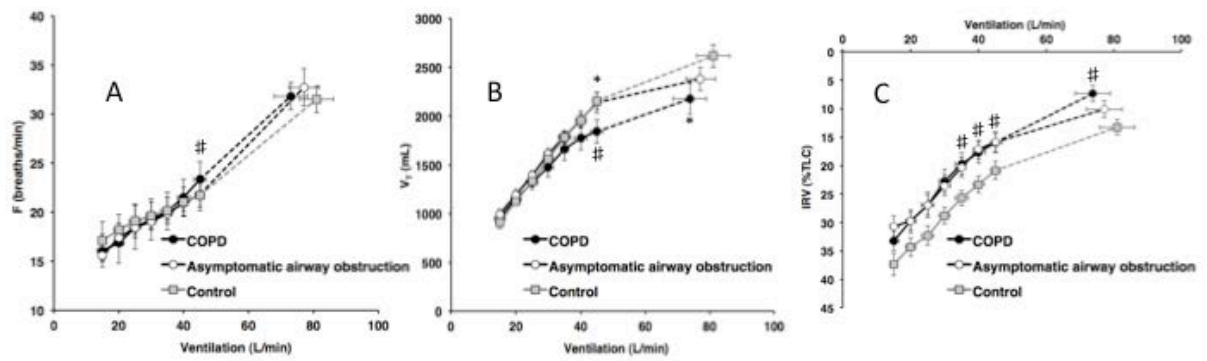

Supplemental Figure 1
